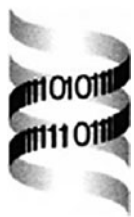

## Alignments anchored on genomic landmarks can aid in the identification of regulatory elements

Kannan Tharakaraman<sup>†</sup>, Leonardo Mariño-Ramírez<sup>†</sup>,  
Sergey Sheetlin, David Landsman and John L. Spouge\*

Computational Biology Branch, National Center for Biotechnology Information,  
National Library of Medicine, National Institutes of Health. Building 38A,  
8600 Rockville Pike, Bethesda, MD 20894-6075, USA

Received on January 15, 2005; accepted on March 27, 2005

### ABSTRACT

**Motivation:** The transcription start site (TSS) has been located for an increasing number of genes across several organisms. Statistical tests have shown that some *cis*-acting regulatory elements have positional preferences with respect to the TSS, but few strategies have emerged for locating elements by their positional preferences. This paper elaborates such a strategy. First, we align promoter regions without gaps, anchoring the alignment on each promoter's TSS. Second, we apply a novel word-specific mask. Third, we apply a clustering test related to gapless BLAST statistics. The test examines whether any specific word is placed unusually consistently with respect to the TSS. Finally, our program A-GLAM, an extension of the GLAM program, uses significant word positions as new 'anchors' to realign the sequences. A Gibbs sampling algorithm then locates putative *cis*-acting regulatory elements. Usually, Gibbs sampling requires a preliminary masking step, to avoid convergence onto a dominant but uninteresting signal from a DNA repeat. However, since the positional anchors focus A-GLAM on the motif of interest, masking DNA repeats during Gibbs sampling becomes unnecessary.

**Results:** In a set of human DNA sequences with experimentally characterized TSSs, the placement of 791 octonucleotide words was unusually consistent (multiple test corrected  $P < 0.05$ ). Alignments anchored on these words sometimes located statistically significant motifs inaccessible to GLAM or AlignACE.

**Availability:** The A-GLAM program and a list of statistically significant words are available at <ftp://ftp.ncbi.nih.gov/pub/spouge/papers/archive/AGLAM/>.

**Contact:** [spouge@ncbi.nlm.nih.gov](mailto:spouge@ncbi.nlm.nih.gov)

### 1 INTRODUCTION

Transcription is a complex cellular process that involves the expression of genes in a manner coordinated both in space and

time. Gene regulation is more complex in mammals than in yeast and it has been suggested that the expansion of regulation in higher eukaryotes could be an important factor contributing to their complexity (Levine and Tjian, 2003).

The identification of individual regulatory elements is the first step to understanding the complexities of gene regulation. Usually, computational methods for identifying *cis*-acting regulatory elements in proximal promoter sequences fall into two classes, alignment and enumeration (Ohler and Niemann, 2001). On one hand, alignment methods identify regulatory motifs by optimizing local alignments of the corresponding sequences. Several different optimization methods have proved useful, e.g. Expectation Maximization in the MEME program (Bailey and Elkan, 1995) or Gibbs sampling (Lawrence *et al.*, 1993) in the GLAM program (Frith *et al.*, 2004b). On the other hand, enumerative methods list all possible DNA words of a fixed length and report motifs as overlaps of the most statistically significant words (Marino-Ramirez *et al.*, 2004; Sinha and Tompa, 2002; Van Helden *et al.*, 1998). Most enumerative methods rely on over-representation to identify statistically significant words. Our strategy is unusual (Fig. 1), because it subordinates word frequencies to word placement (FitzGerald *et al.*, 2004).

The first suggestion to combine enumeration and alignment came from Ohler and Niemann (2001). In this paper, we elaborate on their idea by identifying *cis*-acting regulatory elements in three steps. First, we enumerate all octonucleotide words. Second, we anchor known transcription start sites (TSSs) in a single column of a gapless multiple alignment of human proximal promoter regions (PPRs). After masking, our local maximum statistic (related to the gapless BLAST statistic) then judges whether the unmasked occurrences of an octonucleotide  $W$  form unusual clusters in the alignment columns. Third, we realign the PPRs as follows. Each statistically significant cluster of  $W$  corresponds to certain positions within certain promoter sequences. The positions are 'seeds', and the sequences containing them are 'seed sequences'. We realign the seed sequences, by moving the seeds in them into the same alignment column, forming

\*To whom correspondence should be addressed.

<sup>†</sup>The authors wish it to be known that, in their opinion, the first two authors should be regarded as joint First Authors.

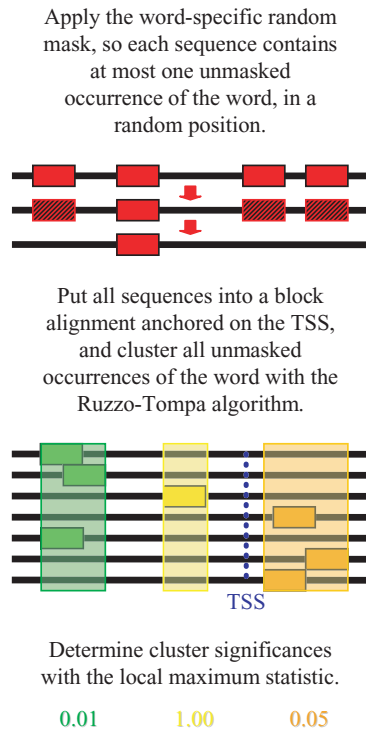

**Fig. 1.** A flow chart of the enumerative step for each word.

another anchored alignment. Other ‘target sequences’ might be added to the multiple alignment as desired, to investigate them for motifs related to the seed word  $W$ . A Gibbs sampler program, A-GLAM (anchored gapless local alignment of multiple sequences) then optimizes the multiple alignment, always constraining its gapless local alignment to include the positions corresponding to the seeds. (In addition, another option in A-GLAM can anchor the alignment on any set of positions thought to contribute to a common regulatory motif.)

## 2 METHODS

### 2.1 Datasets and the TSS-anchored alignment

**2.1.1 The PPR dataset** A previous study (Marino-Ramirez *et al.*, 2004) assembled 4737 human PPRs of length 3001 (positions  $-2000$  to  $+1000$  bp, relative to the TSS at 0 bp) from oligocapping experiments that determined the TSS in each promoter region.

**2.1.2 The mock PPR datasets for statistical controls** The same study also assembled 1000 mock PPR datasets, to provide random controls for our statistic, as recommended elsewhere (Marino-Ramirez *et al.*, 2004). Each mock PPR dataset contained 4737 contiguous DNA sequences of length 3001 bp, sampled uniformly at random from NCBI build 33 of the human genome.

**2.1.3 The TSS-anchored block alignment** Considering  $n$  sequences of length  $l$  aligned in an  $n \times l$  block, column  $i$  of

the alignment contains the  $i$ -th letter of each sequence ( $i = 1, \dots, l$ ). For brevity, we call this arrangement of sequences ‘a block alignment’. In our case, the PPR dataset contained  $n = 4737$  sequences of length  $l = 3001$  and the corresponding block alignment anchored all TSSs in a single column. Given a particular word  $W$ , our overall statistical aim is to identify when unmasked occurrences of  $W$  form unusual clusters in nearby columns within the TSS-anchored alignment.

### 2.2 The word-specific random mask

On one hand, a repeat in a single alignment sequence can cause the clusters of  $W$  we seek. On the other hand, if the repeat could have regulatory functions, vigorous masking of repeats could obscure biologically interesting motifs. Since our statistical methods are enumerative and examine DNA one word at a time, we masked only the particular word  $W$  under scrutiny and no other word. In any particular sequence, if  $W$  occurred more than once, we masked all occurrences except one, randomly choosing the unmasked occurrence.

Our random mask reflects a simple rationale. On one hand, assume that a repeat has regulatory function and forms clusters in the alignment columns because of functional constraints. If the repeat contains a copy of  $W$ , the mask might not completely obscure it. On the other hand, assume that a repeat has no regulatory function and therefore is not functionally constrained to cluster in the alignment columns. Since the unmasked occurrence of  $W$  was chosen randomly, its position is not biased to the front or back of the block alignment, and on its own, the random mask cannot cause clusters. Randomization of a statistical test is theoretically undesirable, because it usually reduces the statistical power. Here, however, the avoidance of false positives from positional bias is paramount.

Our mask applies equally to all words  $W$ , and in particular, self-overlapping words cause us no unusual difficulties. In contrast, enumerative methods based on word frequencies are sometimes constrained to handle self-overlapping words quite delicately (Schbath, 1997).

### 2.3 Statistical methods

After masking, we identify unusual clusters of  $W$  within the TSS-anchored block alignment.

**2.3.1 The local maximum statistic to evaluate clusters** Consider any block alignment, like the PPR dataset, where  $n$  sequences of length  $l$  have been arranged as an  $n \times l$  block. For any particular word  $W$  containing  $w = 8$  letters, if an unmasked instance of  $W$  has its final letter in column  $i$ , we say that  $W$  has ‘occurred at  $i$ ’, where  $w \leq i \leq l$ . The word-specific random mask ensures that  $W$  occurs at most once in each sequence. We wish to locate occurrences of  $W$  unusually clustered in nearby columns within the block alignment.

To develop our clustering statistic, let  $X[i]$  count the number of sequences where  $W$  has occurred at  $i$  ( $i = w, \dots, l$ ), and let  $S[i] = X[w] + \dots + X[i]$  be the cumulative occurrences of  $W$  up to  $i$ . With an arbitrary gap penalty  $a > 0$ , our word

clustering statistic is a so-called ‘local maximum’ statistic (Spouge, 2001) corresponding to the global score  $S[i] - ai$ . The statistic is  $\hat{M}[l] = \max\{D[i, j] : w \leq i \leq j \leq l\}$ , where  $D[i, j] = (S[j] - aj) - (S[i] - ai) = (S[j] - S[i]) - a(j - i)$  for  $w \leq i \leq j \leq l$ . Intuitively,  $D[i, j]$  is large if  $W$  occurs a large number  $S[j] - S[i]$  of times in a short interval  $j - i$  of columns.

To standardize  $a$ , and to avoid declaring a word  $W$  in the PPR dataset significant because of its frequency, for each word  $W$  we set  $a = \rho v$ , where  $\rho > 0$  is an adjustable constant (determined below), and  $v = S[l]/(l - w + 1)$  is the average count per column of the word  $W$ . Thus,  $\rho$  is the factor over the background frequency  $v$  that the word must maintain to keep  $D[i, j]$  positive over a column-interval  $[i, j]$ .

### 2.3.2 The random model for the local maximum statistic

To determine the approximate distribution of  $\hat{M}[l]$  under a random model for DNA sequences, assume that the  $n$  sequences are independent, and that the  $l$  letters of each sequence are chosen independently. Assume also that each letter is independently drawn at random with fixed frequencies from the nucleotide alphabet  $\{A, C, G, T\}$ . Our random mask ensures that  $W$  occurs at most once in each sequence, at a random position. Under the random model, therefore, the  $X[i]$ s are independent and identically distributed with a binomial distribution. The number of binomial trials for each  $X[i]$  is  $n$ , each trial having approximate probability  $\pi \approx S[l]/\{n(l - w + 1)\}$  of success if  $n(l - w + 1)$  is large. If the average number  $v = n\pi$  of occurrences in each column is small,  $X[i]$  is usually 0 or 1, like a Bernoulli trial (coin toss). If  $lv^2$  is also small,  $S[l]$  is approximately Poisson distributed, with mean  $lv$  (Barbour *et al.*, 1992, p. 8). Intuitively, one might expect that the  $\{X[i]\}$  approximate a Poisson process of intensity  $v = S[l]/(l - w + 1)$  on the continuous time interval from  $w$  to  $l$ .

### 2.3.3 The jittering of word occurrences

Unfortunately, two octonucleotide words,  $a_8$  (i.e. aaaaaaaaa) and  $t_8$ , are extremely over-represented in the 4737 PPR sequences, occurring  $>20\,000$  times. Even after masking  $a_8$  (or  $t_8$ ), most columns in the block alignment contain it. At such high word densities, a continuous-time Poisson process could be a poor approximation to random word occurrences, which must be placed at discrete integer positions corresponding to the alignment columns.

‘Jittering’ (described immediately below) removed the technical nuisance of discreteness, improving our Poisson approximation at high word densities, while making little difference at low word densities. We examined our results both with and without jittering.

Let  $W$  occur in position  $i$ . To jitter  $i$ , add a random value chosen uniformly from the (continuous) interval  $[0, 1]$  to it. Let  $S(t)$  be the cumulative jittered occurrences of  $W$  up to the (continuous) time  $t$ , where  $w \leq t \leq l + 1$ . Let  $D(t, u) = \{S(u) - au\} - \{S(t) - at\}$  and  $\hat{M}(l + 1) = \max\{D(t, u) : w \leq t \leq u \leq l + 1\}$  be the continuous time analogs of

$D[i, j]$  and  $\hat{M}[l]$ . Karlin and Dembo (1992) suggest  $\hat{M}(l + 1)$  as a statistic for assessing clustering. We calculated statistical significances in the absence of jittering, approximating the distribution of both  $\hat{M}[l]$  and  $\hat{M}(l + 1)$  as follows.

### 2.3.4 The distribution of the local maximum statistic

Karlin and Dembo (1992) give inequalities on the  $P$ -value  $P\{\hat{M}(l + 1) \geq y\}$  for the Poisson process described above. Their inequalities can be generalized to compound Poisson processes and sharpened to an exact asymptotic formula. The program COMET incorporates the general asymptotic formula (Frith *et al.*, 2002). The formula, given next, describes an extreme value distribution (Aldous, 1989) closely akin to BLAST  $E$ -values (Karlin and Altschul, 1990; Karlin and Dembo, 1992).

As in BLAST,  $P\{\hat{M}(l + 1) \geq y\} = e^{-\mu}$ , where  $\mu$  is an  $E$ -value (i.e. the mean of a Poisson distribution). In BLAST, the  $E$ -value  $\mu = kmn \exp(-\lambda y)$ , where  $m$  and  $n$  are sequence lengths. Here, the  $E$ -value is

$$\mu = kt \exp(-\lambda y), \quad (1)$$

where the time  $t = l - w + 1$ . The relevant scale parameter  $\lambda$  is the unique positive solution to the equation

$$\lambda = \frac{v}{a}(e^\lambda - 1), \quad (2)$$

while the relevant location parameter is

$$k = \lambda a \frac{(1 - (v/a))^2}{(v/a)e^\lambda - 1}. \quad (3)$$

In the notation of Equations 6–8 of Frith *et al.* (2002), Equations (1)–(3) specialize the general compound Poisson process solution with the substitution  $Z = 1$ . Recent versions of BLAST include a statistical correction for edge effects (Altschul and Gish, 1996; Spouge, 2001), but for  $l = 3001$  we omitted the correction, because it is negligible in the present context.

### 2.3.5 The mock PPR datasets as a negative control

The following criterion was used to determine the one adjustable parameter  $\rho$  in our local maximum statistic.

Any random model of DNA raises immediate concerns about the practical accuracy of the  $P$ -values it generates. We used the mock PPR datasets to calibrate the theoretical  $P$ -values of our statistic as follows.

First, note that the  $P$ -value of a continuous variate is uniformly distributed on the interval  $[0, 1]$ , as is one minus the  $P$ -value. [This observation permits, e.g. a Monte Carlo simulation to generate any random variate from a standard uniform variate (Hammersley and Handscomb, 1964, p. 36).]

Now, index all possible DNA octonucleotides by  $W = 1, \dots, m$ , where  $m = 4^8 = 65\,536$ , and let  $\hat{M}\{W\}$  be the local maximum statistic [denoted by  $\hat{M}(l + 1)$  above] corresponding

to the word  $W$ . Let  $U[W] = P(\hat{M}\{W\} \geq y)$  be the corresponding  $P$ -value. As a  $P$ -value, each  $U[W]$  is uniformly distributed on  $[0, 1]$ . The counts of different words  $W$  in the block alignment can be expected to correlate only weakly. Therefore, the following calculation treats the  $\{U[W]\}$  as though they were independent. Let  $U^* = \min\{U[W]: 1 \leq W \leq m\}$  be the minimum  $P$ -value over all  $m = 4^8$  words. Then,

$$P(U^* \leq u) = 1 - (1 - u)^m. \quad (4)$$

Thus, if the smallest  $P$ -value  $u$  for each mock PPR dataset is transformed according to Equation (4), the result should also be a uniform variate on  $[0, 1]$  [the common value in Equation (4) is, after all, one minus the  $P$ -value  $P(U^* > u)$ ]. For each of the 1000 mock PPR datasets, the corresponding minimum  $P$ -value  $U^* = u$  was calculated. If the minimum  $P$ -values  $U^* = u$  (the  $P$ -values of central interest to us) agree with the theoretical probability model, their transformed values  $1 - (1 - u)^m$  should be uniformly distributed on  $[0, 1]$ . We therefore put the 1000 values of  $U^*$  from the mock PPR datasets into increasing order  $U^*[1] \leq \dots \leq U^*[1000]$ , and plotted  $U^*[i]$  against  $i/1000$  for  $i = 1, \dots, 1000$ . If the plot approximates a straight line from  $(0, 0)$  to  $(1, 1)$ , the theoretical result in Equation (1) agrees with  $P$ -values calculated from the mock PPR datasets (Marino-Ramirez *et al.*, 2004).

We therefore selected our one adjustable parameter  $\rho = 5$  to produce good agreement between the plot and a straight line, as follows. For each value of  $\rho$  in the set  $\{1.25, 2.5, 5.0, 10.0\}$ , we used the mock PPR datasets as a negative control, plotting  $U^*[i]$  against  $i/1000$  for  $i = 1, \dots, 1000$ . Figure 2 displays the results.

For  $\rho = 5$ , the transformed  $P$ -values from the mock PPR datasets agreed remarkably well with theoretical calculations. For all words  $W$ , therefore, we set the gap penalty  $a = \rho v = 5v$  where  $v = S[l]/(l - w + 1)$ . Thus, the gap penalty  $a$  permits the differences  $D[i, j]$  to be positive only over columns where the frequency of  $W$  is at least  $\rho = 5$  times  $v$ , the word's background frequency per column.

Results with and without jittering were close for  $\rho \leq 5$  but differed noticeably for gap penalties  $\rho \geq 10$ . The differences probably occurred because the significant word clusters for  $\rho \geq 10$  are very short, and our  $P$ -value starts to detect the discreteness of DNA sequences for over-represented words like  $a_8$  and  $t_8$ . This observation reinforced our decision to fix the gap penalty in our local maximum statistic so that  $\rho = 5$ .

### 2.3.6 The Ruzzo–Tompa algorithm for maximal segments

Our algorithm for finding clusters of words was a mild modification of the linear-time Ruzzo–Tompa algorithm for finding all maximal segments in a set of real numbers  $\{z[1], \dots, z[k]\}$  (Ruzzo and Tompa, 1999). Ruzzo and Tompa give a more detailed description of their algorithm than space permits here.

In brief, a segment is a subset of  $\{z[1], \dots, z[k]\}$  that has the form  $\{z[i + 1], \dots, z[j]\}$ . The segment can be assigned a score  $d[i, j] = z[i + 1] + \dots + z[j]$ . According to Ruzzo

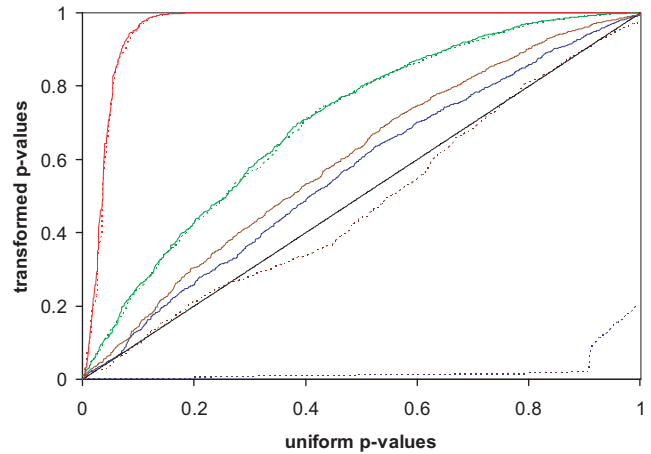

**Fig. 2.**  $U^*[i]$  plotted against  $i/1000$  for  $i = 1, \dots, 1000$  for various values of the gap penalty  $a = \rho v$ , with and without jittering. Solid curves represent jittered distributions; dotted lines represent distributions without jittering. From top to bottom: the red line corresponds to  $\rho = 1.25$ , green,  $\rho = 2.5$ , brown,  $\rho = 5$ ; blue,  $\rho = 10$ . The diagonal line in black represents an ideal result, where the smallest  $P$ -value in every mock PPR dataset agrees the distribution predicted by theory.

and Tompa, a segment has ‘Property P1’ if all subsegments have a lower score. A segment is ‘maximal’, if it has Property P1, but none of its containing segments has Property P1. As a consequence of their definitions, Ruzzo and Tompa show that maximal segments are disjoint.

In our set-up, let the word  $W$  occur  $k$  times in the block alignment, at column positions  $T[1] \leq \dots \leq T[k]$  (some  $T[j]$ s might occur many times, if word positions are not jittered). Associate with  $T[j]$  the cumulative score  $s[j] = j - aT[j]$ , since (in the absence of multiple occurrences)  $W$  occurs  $j$  times up to  $T[j]$ . The set  $\{s[j]\}$  of cumulative scores is the subset of global scores  $S[i] - ai$  from positions  $i$  where the word  $W$  has occurred. Other global scores can be ignored, because they do not contribute to the local maximum statistic. Define  $z[j] = s[j] - s[j - 1] = 1 - a\{T[j] - T[j - 1]\}$ , where  $s[0] = T[0] = 0$ . Maximal segments of  $\{z[1], \dots, z[k]\}$  correspond to disjoint column-intervals  $[i', j']$  that maximize the differences  $D[i', j']$ , e.g. moving either end-column of  $[i', j']$  one position reduces the value of  $D[i', j']$ . We modified the Ruzzo–Tompa algorithm to determine all maximal segments of  $z[j]$ , while maintaining a list of the corresponding positions and sequences where the word  $W$  occurred.

### 2.3.7 The $P$ -value for a segment

To calculate statistical significance of a segment  $\{z[i + 1], \dots, z[j]\}$ , use Equation (1) to determine  $y$ , so that  $p = P\{\hat{M}(l - w + 1) \geq y\}$ . In a block alignment of random sequences, the  $P$ -value  $p$  is greater than or equal to the probability that some segmental score exceeds  $y$ . Since the maximal segments are disjoint, each

segment with a segmental score  $d[i, j] \geq y$  can be considered statistically significant.

## 2.4 The A-GLAM computer program

The third step in our analysis is alignment. Each statistically significant cluster, as identified by the local maximum statistic, provides positional seeds to reanchor the PPR alignment. Our A-GLAM program then optimizes a multiple local alignment to delineate putative *cis*-regulatory elements, always constraining the alignment to line up the seeds.

A-GLAM implements a Gibbs sampling algorithm in C++. It is a generalization of the GLAM program (Frith *et al.*, 2002), with an option to operate in two different modes: (1) GLAM mode and (2) seed-oriented mode.

**2.4.1 A-GLAM in GLAM mode** In its GLAM mode, A-GLAM mimics GLAM. Details of the GLAM algorithm appear elsewhere (Frith *et al.*, 2004b). In brief, the GLAM algorithm takes a set of sequences as input. The initial step of GLAM places a single window of arbitrary size within every sequence at an arbitrary position, forming a gapless multiple alignment of the windowed subsequences. GLAM then performs fixed number adjustment steps. Each adjustment step either repositions or resizes the alignment windows, and it is then either accepted or rejected according to probabilities given below. A repositioning adjustment step selects one sequence uniformly at random and then repositions its window. A resizing adjustment step resizes all windows by selecting first the right and then the left end of the alignment. If GLAM decides to resize an end, it shifts the corresponding end of all alignment windows one position to either the right or the left. The resizing step leads automatically to a best window width and permits GLAM to escape from alignments that are optimal but for the positions of their ends.

In contrast to the OOPS (one occurrence per sequence) mode just described, GLAM's ZOOPS (zero or one occurrence per sequence) option also implements a 0–1 adjustment step, either dropping or adding a sequence to the multiple alignment. Thus, the ZOOPS option leads to a final alignment that might or might not include all input sequences.

The repositioning, resizing and 0–1 steps are all probabilistic, with the *S*-score in Equation (5) below governing the relevant distributions. To be specific, the probability of each permissible adjustment move is proportional to  $\exp(s)$ , where *s* is the *S*-score of alignment after adjustment move has taken place. The probabilistic nature of the sampling algorithm permits it to escape from local maxima of *s* and converge on a global maximum.

GLAM itself operates in two basic modes. One mode samples the equilibrium Boltzmann distribution  $\exp(s)$ ; the other simulates an annealing process, lowering a temperature parameter *kT* to pass through states corresponding to quasi-equilibrated Boltzmann distributions  $\exp\{s/(kT)\}$ . When the temperature parameter *kT* finally converges to 0, the Gibbs

sampler should converge on the multiple alignment minimizing the energy  $-s$ . In practice, however, GLAM finds good alignments reasonably well in either mode.

GLAM performs several independent runs on its input. If most runs lead to similar best alignments, a user can be confident of the alignment output.

**2.4.2 A-GLAM in seed-oriented mode** The seed-oriented mode exploits positional information about regulatory elements, e.g. the positions in the statistically significant word clusters derived from the enumerative steps in our analysis. In the seed-oriented mode, A-GLAM takes a set of sequences as input, along with either: (1) a word and a subset of the input sequences or (2) a list of windows, at most one per input sequence and all of equal size. The extra input provides 'seeds' for the A-GLAM alignment. In both cases, although the probability of each permissible move remains proportional to  $\exp(s)$ , the adjustment step is subject to an extra restriction. In case (1), A-GLAM continues to align one exact copy of the 'seed word' in all 'seed sequences'. In case (2), A-GLAM continues to align the original list of windows in the seed sequences. In each case, therefore, A-GLAM uses the seed sequences to direct its search in the remaining non-seed 'target sequences'. Note that with its seed positions, case (2) can accommodate a wide range of searching strategies.

**2.4.3 The overall score in A-GLAM** A-GLAM judges the merits of a multiple alignment with its overall alignment score. In bits (with all logs to the base 2), the overall score for an alignment of width *w* is

$$s = \sum_{i=1}^w \left( \log \frac{(a-1)!}{(c+a-1)!} + \sum_{(j)} \left\{ \log \left[ \frac{(c_{ij} + a_j - 1)!}{(a_j - 1)!} \right] - c_{ij} \log p_j \right\} \right). \quad (5)$$

The overall score *s* in Equation (5) is a marginal Bayesian predictive log-odds score corresponding to an alternative hypothesis involving the Dirichlet distribution. In Equation (5),  $m! = m(m-1) \dots 1$  denotes a factorial;  $a_j$ , the pseudocounts for nucleic acid *j* in each position;  $a = a_1 + a_2 + a_3 + a_4$ , the total pseudocounts in each position;  $c_{ij}$ , the count of nucleic acid *j* in position *i*; and  $c = c_{i1} + c_{i2} + c_{i3} + c_{i4}$ , the total number of aligned windows, which is independent of the position *i*. The rationale for the overall score *s* in GLAM is explained in detail elsewhere (Frith *et al.*, 2004b). In brief, *s* can be computed rapidly, a desirable property for large datasets. Moreover, its expectation decreases with the increasing alignment width. Thus, the overall score *s* constrains the window size around a high-scoring alignment, without any *ad hoc* adjustments.

**2.4.4 The individual score (delta *S*-score)** A-GLAM also assigns an *E*-value to individual sequences in its final

alignment, much like the  $E$ -values for individual protein sequences in PSI-BLAST (Altschul and Koonin, 1998; Altschul *et al.*, 1997; Schaffer *et al.*, 2001).

Consider a window of length  $w$  that is about to be added to A-GLAM's alignment. Let  $\delta[i, j]$  equal 1 if the window has nucleic acid  $j$  in position  $i$  and 0 otherwise. The addition of the new window changes the overall score by

$$\Delta s = \sum_{i=1}^w \sum_{j=1}^4 \delta[i, j] \log \left[ \frac{(c_{ij} + a_j)}{c + a} \right] / p_j. \quad (6)$$

The score change corresponds to evaluating the new window with a position-specific scoring matrix (PSSM) that assigns the 'individual score'

$$s[i, j] = \log \left[ \frac{(c_{ij} + a_j)}{c + a} \right] / p_j \quad (7)$$

to nucleic acid  $j$  in position  $i$ . Equation (7) represents a log-odds score for an alternative hypothesis that places nucleic acid  $j$  in position  $i$  with probability  $(c_{ij} + a_j)/(c + a)$ . The probability corresponds to a frequency derived by adding the empirical counts  $c_{ij}$  to the pseudocounts  $a_j$ . PSI-BLAST uses Equation (7) to calculate its  $E$ -values: the derivation with Equation (6) also confirms the PSSM in Equation (7) as the natural choice for evaluating individual sequences.

Consider a particular alignment sequence, and let  $\Delta s[i]$  denote the quantity in Equation (6) when the final letter in the window falls at position  $i$  of the alignment sequence. Let  $\Delta s^* = \max\{\Delta s[i]; i = w, \dots, l\}$  be the maximum individual score over all sequence positions  $i$ . We assigned an  $E$ -value to the actual value  $\Delta s^*$ , as follows. Let  $l$  and  $w$  be the sequence length and window size. In brief, Staden's method (Staden, 1989) yields  $P(\Delta S \geq \Delta s^*)$  for a specific window, with its bases chosen independently and randomly from the frequency distribution  $\{p_j\}$ . Our  $E$ -value is  $(l - w + 1)P(\Delta S \geq \Delta s^*)$ , the expected number of sequence positions with an individual score exceeding  $\Delta s^*$ . The factor  $l - w + 1$  is essentially a multiple test correction in the  $E$ -value.

All sequence logos (Schneider and Stephens, 1990) of predicted motifs in Figures 3–6 were generated from <http://weblogo.berkeley.edu/logo.cgi> (Crooks *et al.*, 2004).

### 3 RESULTS

*The presence of significant words in TRANSFAC.* Of the  $4^8$  different octonucleotides, only 791 were significant at  $P \leq 0.05$  after multiplying their  $P$ -value by  $4^8$  to correct for multiple testing. Table 1 is a  $2 \times 2$  table whose columns divide the  $4^8$  octonucleotides into two groups, those significant at  $P \leq 0.05$  and those that are not. Its rows divide the octonucleotides by presence or absence in the vertebrate subset of the TRANSFAC database (version 8.4) (Matys *et al.*, 2003).

**Table 1.** A  $2 \times 2$  table of significance and presence in TRANSFAC

| Octonucleotides | Significant<br>( $P < 0.05$ ) | Not significant<br>( $P > 0.05$ ) |
|-----------------|-------------------------------|-----------------------------------|
| In TRANSFAC     | 388                           | 17 400                            |
| Not in TRANSFAC | 413                           | 47 335                            |

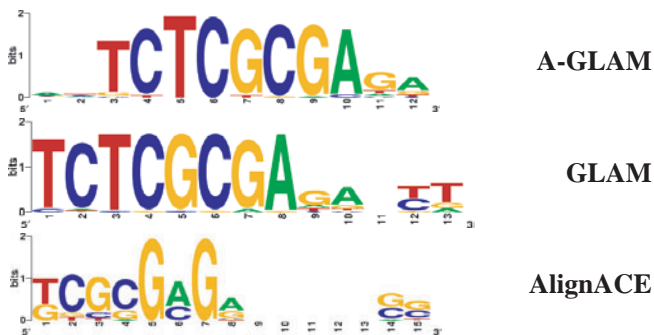

**Fig. 3.** A motif identified using the seed `ctcgcgag` in A-GLAM overlaps with a recently discovered motif (FitzGerald *et al.*, 2004) present near the TSS in ribosomal genes and genes involved in oxidative phosphorylation.

Most octonucleotides in TRANSFAC are associated with at least one binding factor, according to literature references. A  $\chi^2$ -test ( $P = 4.12 \times 10^{-42}$ ) indicates that statistically significant octonucleotides occur more frequently in TRANSFAC than chance alone can explain.

*Comparison of A-GLAM, GLAM and AlignACE.* Our test sequences sets were constructed from human PPRs containing known transcription factor binding sites: some were previously used to test GLAM (Frith *et al.*, 2004a). Only AlignACE (Hughes *et al.*, 2000) had computational difficulties when the input sequences were on a genomic scale.

In its GLAM mode, A-GLAM found essentially the same regulatory motifs as GLAM and AlignACE (data not shown). On many sequence sets containing numerous annotated, well-defined binding sites, therefore, the motif A-GLAM returned was located upstream of an appropriate set of genes and was consistent with the consensus sequence in the literature.

In seed-oriented mode, however, A-GLAM occasionally returned more satisfactory motifs than GLAM or AlignACE. Figure 3, shows a motif found in ribosomal genes and genes involved in oxidative phosphorylation. Figure 4 shows a TRANSFAC motif in NRF-1 that A-GLAM returned from the seed `gcgcgatgc`. Figure 5 shows that the seed-oriented mode of A-GLAM identified the TATA box, whereas GLAM returned an alignment that could not be identified among known motifs. Finally, Figure 6 shows a YY-1 transcription factor binding site that A-GLAM returned from the seed `aagatggc`.

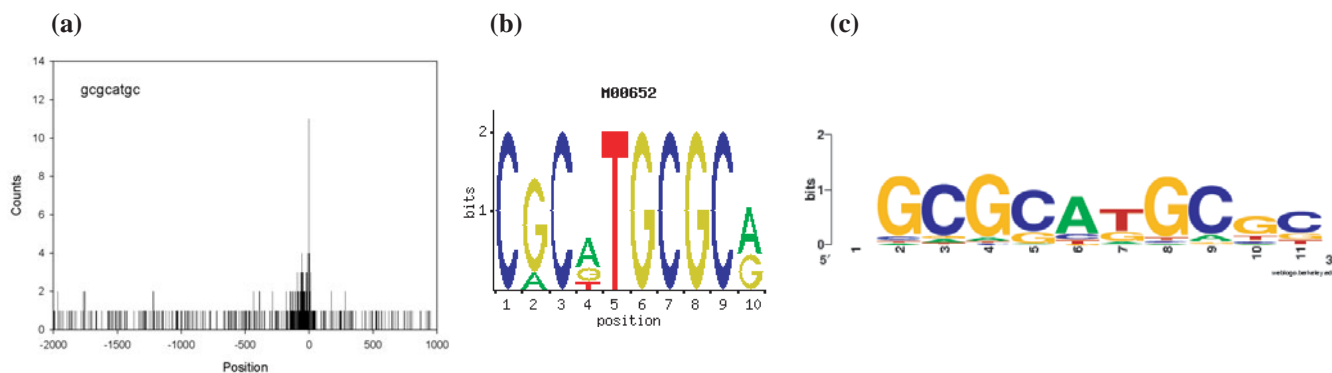

**Fig. 4.** Using the seed *ggcgatgc*, A-GLAM identified a motif in TRANSFAC corresponding to the NRF-1 factor (NF-kappaB-repressing factor). (a) Columns of the block alignments near the TSS at column 0 are shown to be enriched with occurrences of *ggcgatgc*. (b) Shows a sequence logo of the corresponding motif in TRANSFAC. (c) Displays the motif A-GLAM produced from the seed *ggcgatgc*.

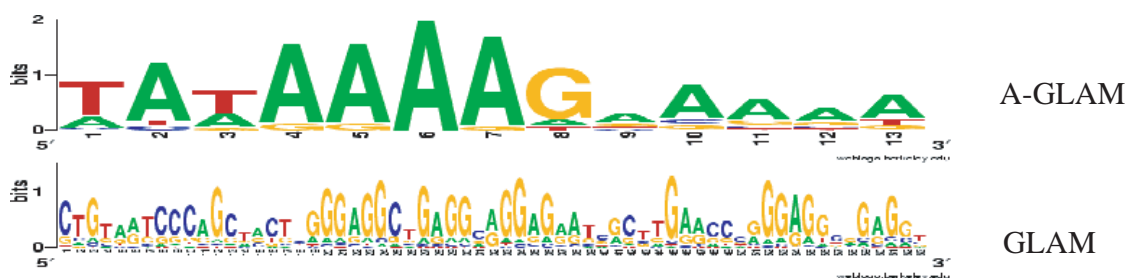

**Fig. 5.** Using the seed *tataaaaa*, A-GLAM identified a motif corresponding to the enriched TATA box. AlignACE was unable to return a motif from the input, whereas GLAM returned a motif that could not be identified.

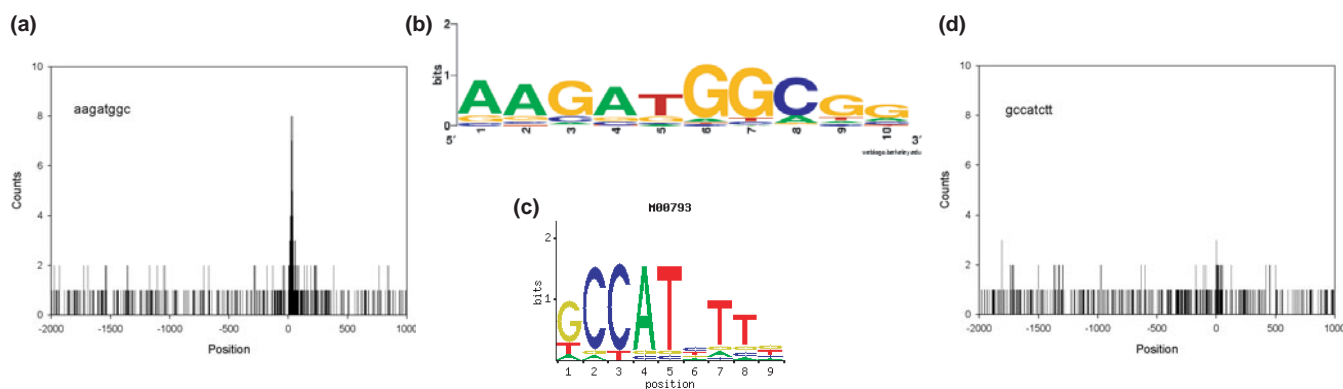

**Fig. 6.** Using the seed *aagatggc*, A-GLAM identified a motif corresponding to the YY-1 transcription factor binding site near the TSS. (a) Columns of the block alignments near the TSS at column 0 are shown to be enriched with occurrences of *aagatggc* (multiple-test corrected local-maximum  $P$ -value 0.00). (b) Sequence logo returned by the seed-oriented mode of A-GLAM. (c) Sequence logo for the YY-1 site in TRANSFAC. (d) Columns of the block alignments near the TSS at column 0 are shown to be enriched with occurrences of the seed *gccatctt* (multiple-test corrected local-maximum  $P$ -value 1.66). The strand-specific difference between these reverse complements *aagatggc* and *gccatctt* is apparent.

## 4 DISCUSSION

We have developed a two-step method for identifying *cis*-acting regulatory elements in human promoter regions. First, an enumerative step determines  $P$ -values for each possible

octonucleotide word. Our local maximum statistic evaluates each word's tendency to cluster in a block alignment anchored on the TSS. A  $\chi^2$ -test on a  $2 \times 2$  table ( $P = 4.12 \times 10^{-42}$ ) shows that the statistic does indeed identify biologically

relevant DNA words. Second, an alignment step uses either words or positions from the first step as ‘seeds’. Our Gibbs sampler program A-GLAM optimizes a multiple alignment while constraining it to contain the seeds. The idea of combining enumerative and alignment methods was first put forward by Ohler and Niemann (2001), but ours appears to be its first practical implementation.

Low-complexity regions, such as Alu repeats or tracts of poly(A), often distract Gibbs samplers from subtle but biologically interesting signals (Frith *et al.*, 2004a), because the regions deviate noticeably from theoretical approximations to the true distribution of ‘random DNA’. The standard strategy against repeats is to mask them with programs, such as Repeat-Masker (Smit *et al.*, 1996, <http://www.repeatmasker.org>). Unfortunately, masking can obscure regulatory elements associated with the low-complexity region. Our word-specific random mask avoids many problems associated with low-complexity regions. As an example of our methods, the local maximum statistic is able to identify aaaaaaaaa as a word with no specific clustering tendencies (multiple-test corrected  $P$ -value =  $6.5e+03$  after jittering) despite its over-abundance in our human promoter dataset. Because A-GLAM’s seeds automatically focus it on a motif of interest, A-GLAM does not require repetitive elements to be masked during Gibbs sampling.

Anchored alignments might speed the investigation of RNA splicing signals, non-coding RNA processing signals, origins of replication and 3’ regulatory elements. Moreover, recent efforts to identify and delineate the transcribed regions of the human genome (Bertone *et al.*, 2004) and to map transcription factor binding sites along chromosomes (Cawley *et al.*, 2004) provide potential alignment anchors. Our methods therefore seem well adapted for identifying the corresponding regulatory elements.

## ACKNOWLEDGEMENTS

We gratefully acknowledge the many useful conversations with Drs Martin C. Frith and Zhiping Weng. We also thank the referees for their suggestions which improved the paper considerably.

## REFERENCES

- Aldous, D. (1989) *Probability Approximations via the Poisson Clumping Heuristic*. Springer-Verlag, New York.
- Altschul, S.F. and Gish, W. (1996) Local alignment statistics. *Methods Enzymol.*, **266**, 460–480.
- Altschul, S.F. and Koonin, E.V. (1998) Iterated profile searches with PSI-BLAST—a tool for discovery in protein databases. *Trends Biochem. Sci.*, **23**, 444–447.
- Altschul, S.F., Madden, T.L., Schaffer, A.A., Zhang, J., Zhang, Z., Miller, W. and Lipman, D.J. (1997) Gapped BLAST and PSI-BLAST: a new generation of protein database search programs. *Nucleic Acids Res.*, **25**, 3389–3402.
- Bailey, T.L. and Elkan, C. (1995) Unsupervised learning of multiple motifs in biopolymers using expectation maximization. *Machine Learning*, **21**, 51–83.
- Barbour, A.D., Holst, L. and Janson, S. (1992) *Poisson Approximation*. Clarendon Press, Oxford.
- Bertone, P., Stolc, V., Royce, T.E., Rozowsky, J.S., Urban, A.E., Zhu, X., Rinn, J.L., Tongprasit, W., Samanta, M., Weissman, S., Gerstein, M. and Snyder, M. (2004) Global identification of human transcribed sequences with genome tiling arrays. *Science*, **306**, 2242–2246.
- Cawley, S., Bekiranov, S., Ng, H.H., Kapranov, P., Sekinger, E.A., Kampa, D., Piccolboni, A., Sementchenko, V., Cheng, J., Williams, A.J. *et al.* (2004) Unbiased mapping of transcription factor binding sites along human chromosomes 21 and 22 points to widespread regulation of noncoding RNAs. *Cell*, **116**, 499–509.
- Crooks, G.E., Hon, G., Chandonia, J.M. and Brenner, S.E. (2004) Weblogo: a sequence logo generator. *Genome Res.*, **14**, 1188–1190.
- FitzGerald, P.C., Shlyakhtenko, A., Mir, A.A. and Vinson, C. (2004) Clustering of DNA sequences in human promoters. *Genome Res.*, **14**, 1562–1574.
- Frith, M.C., Fu, Y., Yu, L., Chen, J.F., Hansen, U. and Weng, Z. (2004a) Detection of functional DNA motifs via statistical over-representation. *Nucleic Acids Res.*, **32**, 1372–1381.
- Frith, M.C., Hansen, U., Spouge, J.L. and Weng, Z. (2004b) Finding functional sequence elements by multiple local alignment. *Nucleic Acids Res.*, **32**, 189–200.
- Frith, M.C., Spouge, J.L., Hansen, U. and Weng, Z. (2002) Statistical significance of clusters of motifs represented by position specific scoring matrices in nucleotide sequences. *Nucleic Acids Res.*, **30**, 3214–3224.
- Hammersley, J.M. and Handscomb, D.C. (1964) *Monte Carlo Methods*. Chapman and Hall, London.
- Hughes, J.D., Estep, P.W., Tavazoie, S. and Church, G.M. (2000) Computational identification of *cis*-regulatory elements associated with groups of functionally related genes in *Saccharomyces cerevisiae*. *J. Mol. Biol.*, **296**, 1205–1214.
- Karlin, S. and Altschul, S.F. (1990) Methods for assessing the statistical significance of molecular sequence features by using general scoring schemes. *Proc. Natl Acad. Sci. USA*, **87**, 2264–2268.
- Karlin, S. and Dembo, A. (1992) Limit distributions of maximal segmental score among Markov-dependent partial-sums. *Adv. Appl. Probab.*, **24**, 113–140.
- Lawrence, C.E., Altschul, S.F., Boguski, M.S., Liu, J.S., Neuwald, A.F. and Wootton, J.C. (1993) Detecting subtle sequence signals: a Gibbs sampling strategy for multiple alignment. *Science*, **262**, 208–214.
- Levine, M. and Tjian, R. (2003) Transcription regulation and animal diversity. *Nature*, **424**, 147–151.
- Marino-Ramirez, L., Spouge, J.L., Kanga, G.C. and Landsman, D. (2004) Statistical analysis of over-represented words in human promoter sequences. *Nucleic Acids Res.*, **32**, 949–958.
- Matys, V., Fricke, E., Geffers, R., Gossling, E., Haubrock, M., Hehl, R., Hornischer, K., Karas, D., Kel, A.E., Kel-Margoulis, O.V. *et al.* (2003) Transfac: transcriptional regulation, from patterns to profiles. *Nucleic Acids Res.*, **31**, 374–378.

- Ohler,U. and Niemann,H. (2001) Identification and analysis of eukaryotic promoters: recent computational approaches. *Trends Genet.*, **17**, 56–60.
- Ruzzo,W.L. and Tompa,M. (1999) In *Seventh International Conference on Intelligent Systems for Molecular Biology*, Heidelberg, Germany.
- Schaffer,A.A., Aravind,L., Madden,T.L., Shavirin,S., Spouge,J.L., Wolf,Y.I., Koonin,E.V. and Altschul,S.F. (2001) Improving the accuracy of PSI-BLAST protein database searches with composition-based statistics and other refinements. *Nucleic Acids Res.*, **29**, 2994–3005.
- Schbath,S. (1997) An efficient statistic to detect over- and under-represented words in DNA sequences. *J. Comput. Biol.*, **4**, 189–192.
- Sinha,S. and Tompa,M. (2002) Discovery of novel transcription factor binding sites by statistical overrepresentation. *Nucleic Acids Res.*, **30**, 5549–5560.
- Smit,A., Hubley,R. and Green,P. (1996) Repeatmasker.
- Spouge,J.L. (2001) Finite-size correction to Poisson approximations of rare events in renewal processes. *J. Appl. Prob.*, **38**, 554–569.
- Staden,R. (1989) Methods for calculating the probabilities of finding patterns in sequences. *Comput. Appl. Biosci.*, **5**, 89–96.
- Van Helden,J., Andre,B. and Collado-Vides,J. (1998) Extracting regulatory sites from the upstream region of yeast genes by computational analysis of oligonucleotide frequencies. *J. Mol. Biol.*, **281**, 827–842.
